# Supplementary material for: An Efficient Photodynamic Therapy Treatment for Human Pancreatic Adenocarcinoma
Source: MDPI journal article supplement (doi:10.3390/jcm9010192), 2020-01-10
Supplement: s1 [file s1]

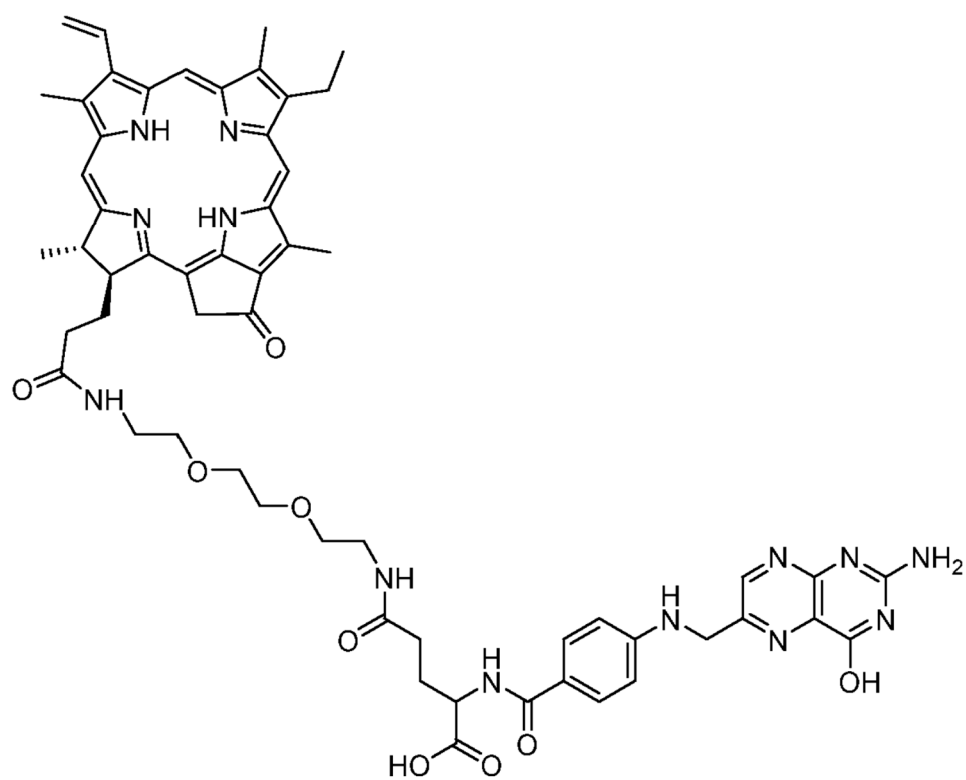

**Figure S1.** Structural formula of the compound Pyro-PEG-FA (PS2).
